# Supplementary material
Source: PubMed Central journal article supplement (PMC3716063)
Supplement: JCM.00446-13_zjm999092547so1.pdf [file JCM.00446-13_zjm999092547so1.pdf]

|                                              |                       |                     |                     |                         |     |
|----------------------------------------------|-----------------------|---------------------|---------------------|-------------------------|-----|
|                                              |                       |                     | 20                  |                         | 40  |
| Patient Isolate 2009 H1N1                    | <b>AAGCCGAGAT</b>     | <b>CGCGCAGAGA</b>   | <b>CTGGAAAGTG</b>   | <b>TCTTTGCAGG</b>       | 40  |
| Influenza A (Port Chalmers 1 1973 (H3N2))    | a a g c c g a a a t   | c g c g c a g a g a | c t t g a a g a t g | t c t t t g c t g g     | 40  |
| Influenza A (Mexico City INER16 2009 (H1N1)) | a a g c c g a g a t   | c g c g c a g a g a | c t g g a a a g t g | t c t t t g c a g g     | 40  |
|                                              |                       |                     | 60                  |                         | 80  |
| Patient Isolate 2009 H1N1                    | <b>AAAGAACACA</b>     | <b>GATCTTGAGG</b>   | <b>CTCTCATGGA</b>   | <b>ATGGCTAAAG</b>       | 80  |
| Influenza A (Port Chalmers 1 1973 (H3N2))    | a a g a a c a c a c a | g a t c t t g a g g | c t c t c a t g g a | a t g g c t a a a g     | 80  |
| Influenza A (Mexico City INER16 2009 (H1N1)) | a a g a a c a c a c a | g a t c t t g a g g | c t c t c a t g g a | a t g g c t a a a g     | 80  |
|                                              |                       |                     | 100                 |                         | 120 |
| Patient Isolate 2009 H1N1                    | <b>ACAAGACCAA</b>     | <b>TCTTGTCCAC</b>   | <b>CCTGACTAAG</b>   | <b>GGAATTTTAG</b>       | 120 |
| Influenza A (Port Chalmers 1 1973 (H3N2))    | a c a a g a c c a a   | t c t t g t c a c c | t c t g a c t a a g | g g g a t t t t g g     | 120 |
| Influenza A (Mexico City INER16 2009 (H1N1)) | a c a a g a c c a a   | t c t t g t c a c c | t c t g a c t a a g | g g a a t t t t a g     | 120 |
|                                              |                       |                     | 140                 |                         | 160 |
| Patient Isolate 2009 H1N1                    | <b>GATTGTGTGT</b>     | <b>CACGCTCACC</b>   | <b>GTGCCCAGTG</b>   | <b>AGCGAGGACT</b>       | 160 |
| Influenza A (Port Chalmers 1 1973 (H3N2))    | g a t t t g t a t t   | c a c g c t c a c c | g t g c c c a g t g | a g c g a g g a c t     | 160 |
| Influenza A (Mexico City INER16 2009 (H1N1)) | g a t t t g t g t t   | c a c g c t c a c c | g t g c c c a g t g | a g c g a g g a c t     | 160 |
|                                              |                       |                     | 180                 |                         | 200 |
| Patient Isolate 2009 H1N1                    | <b>GCAGCGTAGA</b>     | <b>CGCTTTATCC</b>   | <b>AAAATGCCCT</b>   | <b>AAATGGGAAT</b>       | 200 |
| Influenza A (Port Chalmers 1 1973 (H3N2))    | g c a g c g t a g a   | c g c t t t g t c c | a a a a t g c c c t | c a a t g g g a a t     | 200 |
| Influenza A (Mexico City INER16 2009 (H1N1)) | g c a g c g t a g a   | c g c t t t g t c c | a a a a t g c c c t | a a a t g g g a a t     | 200 |
|                                              |                       |                     | 220                 |                         | 240 |
| Patient Isolate 2009 H1N1                    | <b>GGGGACCCGA</b>     | <b>ACAACATGGA</b>   | <b>TAGAGCAGTT</b>   | <b>AAACTATACA</b>       | 240 |
| Influenza A (Port Chalmers 1 1973 (H3N2))    | g g g g a t c c a a   | a t a a c a t g g a | c a g a g c a g t t | a a a c t g t a t a     | 240 |
| Influenza A (Mexico City INER16 2009 (H1N1)) | g g g g a c c c g a   | a c a a c a t g g a | t a g a g c a g t t | a a a c t a t a c a     | 240 |
|                                              |                       |                     | 260                 |                         | 280 |
| Patient Isolate 2009 H1N1                    | <b>AGAAGCTCAA</b>     | <b>AAGAGAAATA</b>   | <b>ACGTTCCATG</b>   | <b>GGGCCAAGGA</b>       | 280 |
| Influenza A (Port Chalmers 1 1973 (H3N2))    | g a a a c t t a a     | g a g g g a g a t a | a c a t t c c a t g | g g g c c a a g a       | 280 |
| Influenza A (Mexico City INER16 2009 (H1N1)) | a g a a g c t c a a   | a a g a g a a a t a | a c g t t c c a t g | g g g c c a a g g a     | 280 |
|                                              |                       |                     | 300                 |                         | 320 |
| Patient Isolate 2009 H1N1                    | <b>GGTGTCACTA</b>     | <b>AGCTATTCAA</b>   | <b>CTGGTGCAC</b>    | <b>TGCCAGTTGC</b>       | 320 |
| Influenza A (Port Chalmers 1 1973 (H3N2))    | a a t a g c a c t c   | a g t t a t t c t g | c t g g t g c g c t | t g c c a g t t g c     | 320 |
| Influenza A (Mexico City INER16 2009 (H1N1)) | g g t g t c a c t a   | a g c t a t t c a a | c t g g t g c a c t | t g c c a g t t g c     | 320 |
|                                              |                       |                     | 340                 |                         | 360 |
| Patient Isolate 2009 H1N1                    | <b>ATGGGCCTCA</b>     | <b>TATACAACAG</b>   | <b>GATGGGAACA</b>   | <b>GTGACCACAG</b>       | 360 |
| Influenza A (Port Chalmers 1 1973 (H3N2))    | a t g g g c c t c a   | t a t a c a a c a g | a a t g g g g g c t | g t g a c c a c t g     | 360 |
| Influenza A (Mexico City INER16 2009 (H1N1)) | a t g g g c c t c a   | t a t a c a a c a g | g a t g g g a a c a | g t g a c c a c a g     | 360 |
|                                              |                       |                     | 380                 |                         | 400 |
| Patient Isolate 2009 H1N1                    | <b>AAGCTGCTTT</b>     | <b>TGGTCTAGTG</b>   | <b>TGTGCCACTT</b>   | <b>GTGAACAGAT</b>       | 400 |
| Influenza A (Port Chalmers 1 1973 (H3N2))    | a a g t g g c c t t   | t g g c t g g t a   | t g t g c a a c c t | g t g a a c a g a t     | 400 |
| Influenza A (Mexico City INER16 2009 (H1N1)) | a a g c t g c t t t   | t g g t c t a g t g | t g t g c c a c t t | g t g a a c a g a t     | 400 |
|                                              |                       |                     | 420                 |                         | 440 |
| Patient Isolate 2009 H1N1                    | <b>TGCTGATTCA</b>     | <b>CAGCATCGGT</b>   | <b>CTCACAGACA</b>   | <b>AATGGCTACT</b>       | 440 |
| Influenza A (Port Chalmers 1 1973 (H3N2))    | t g c t g a t t c a   | c a g c a c a g g t | c t c a t a g a c a | a a t g g t g g c a     | 440 |
| Influenza A (Mexico City INER16 2009 (H1N1)) | t g c t g a t t c a   | c a g c a t c g g t | c t c a c a g a c a | a a t g g c t a c t     | 440 |
|                                              |                       |                     | 460                 |                         | 480 |
| Patient Isolate 2009 H1N1                    | <b>ACAACCAATC</b>     | <b>CACTAATCAG</b>   | <b>GCATGAAAAC</b>   | <b>AGAATGGTGC</b>       | 480 |
| Influenza A (Port Chalmers 1 1973 (H3N2))    | a c a a c c a a t c   | c a c t a a t a a g | a c a t g a g a a c | a g a a t g g t t c     | 480 |
| Influenza A (Mexico City INER16 2009 (H1N1)) | a c c a c c a a t c   | c a c t a a t c a g | g c a t g a a a a c | a g a a t g g t g c     | 480 |
|                                              |                       |                     | 500                 |                         | 520 |
| Patient Isolate 2009 H1N1                    | <b>TGGCTAGCAC</b>     | <b>TACGGCAAAG</b>   | <b>GCTATGGAAC</b>   | <b>AGGTGGCTGG</b>       | 520 |
| Influenza A (Port Chalmers 1 1973 (H3N2))    | t g g c c a g c a c   | t a c a g c t a a g | g c t a t g g a g c | a a a t g g c t g g     | 520 |
| Influenza A (Mexico City INER16 2009 (H1N1)) | t g g c t a g c a c   | t a c g g c a a a g | g c t a t g g a a c | a g a t g g c t g g     | 520 |
|                                              |                       |                     | 540                 |                         | 560 |
| Patient Isolate 2009 H1N1                    | <b>ATCGAGTGAA</b>     | <b>CAGGCAGCAG</b>   | <b>AGGCCATGGA</b>   | <b>GGTTGCTAAT</b>       | 560 |
| Influenza A (Port Chalmers 1 1973 (H3N2))    | a t c a a g t g a g   | c a g g c a g c a g | a g g c c a t g g a | g g t t g c t a g t     | 560 |
| Influenza A (Mexico City INER16 2009 (H1N1)) | a t c g a g t g a a   | c a g g c a g c a g | a g g c c a t g g a | g g t t g c t a a t     | 560 |
|                                              |                       |                     | 580                 |                         | 600 |
| Patient Isolate 2009 H1N1                    | <b>CAGACTAGGC</b>     | <b>AGATGGTACA</b>   | <b>TGCAATGAGA</b>   | <b>ACTATTGGGA</b>       | 600 |
| Influenza A (Port Chalmers 1 1973 (H3N2))    | c a g g c c a g g c   | a a a t g g t g c a | g g c a a t g a g a | g c c a t t g g g a     | 600 |
| Influenza A (Mexico City INER16 2009 (H1N1)) | c a g a c t a g g c   | a g a t g g t a c a | t g c a a t g a g a | a c t a t t g g g a     | 600 |
|                                              |                       |                     | 620                 |                         | 640 |
| Patient Isolate 2009 H1N1                    | <b>CTCATCCTAG</b>     | <b>CTCCNGTGCT</b>   | <b>GGTCTGAGAG</b>   | <b>ATGACCTTCT</b>       | 640 |
| Influenza A (Port Chalmers 1 1973 (H3N2))    | c t c a t c c t a g   | c t c c a g t g c t | g g t c t a a a a g | a t g a c t t c t c t   | 640 |
| Influenza A (Mexico City INER16 2009 (H1N1)) | c t c a t c c t a g   | c t c c a g t g c t | g g t c t g a a a g | a t g a c c t t c t c t | 640 |
|                                              |                       |                     | 660                 |                         | 677 |
| Patient Isolate 2009 H1N1                    | <b>TGAAAATTTG</b>     | <b>CAGGCCTACC</b>   | <b>AGAAGCGAAA</b>   | <b>GGGAGTG</b>          | 677 |
| Influenza A (Port Chalmers 1 1973 (H3N2))    | t g a a a a t t t g   | c a g g c c t a t c | a g a a a c g a a t | g g g g g t g           | 677 |
| Influenza A (Mexico City INER16 2009 (H1N1)) | t g a a a a t t t g   | c a g g c c t a c c | a g a a g c g a a t | g g g a g t g           | 677 |
